# Supplementary material for: Pre- and Post-Harvest Conditions Affect Polyphenol Content in Strawberry (Fragaria × ananassa)
Source: MDPI journal article supplement (doi:10.3390/plants11172220), 2022-08-27
Supplement: s1 [file s1]

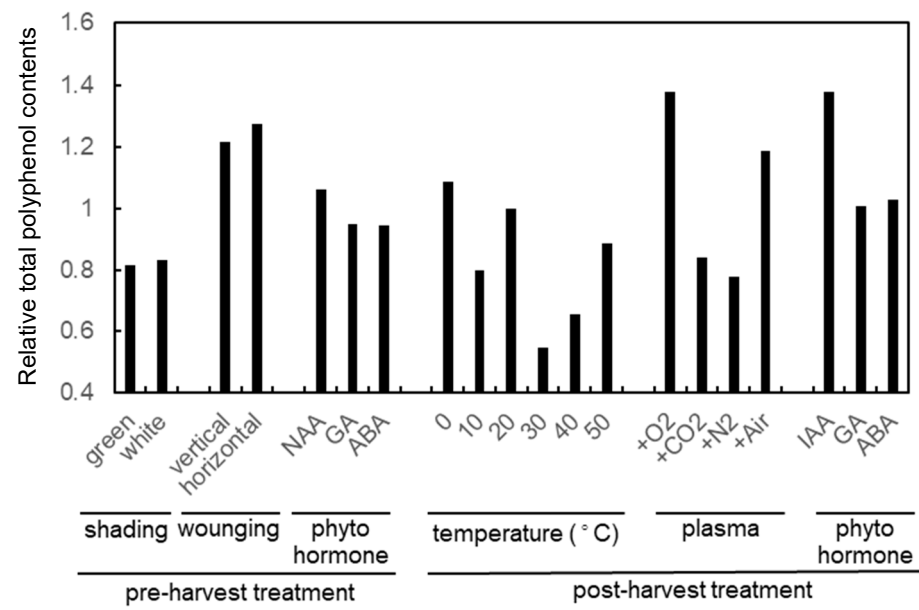

**Figure S1.** Relative total polyphenol contents in strawberry fruits under various pre- and post-harvest conditions. The bars are shown as relative value to the control in each treatment test (n=1 or 2).
